# Supplementary material for: Quantifying and Cataloguing Unknown Sequences within Human Microbiomes
Source: PubMed Central journal article supplement (PMC9052204; doi:10.1128/msystems.01468-21), 2022-03-08
Supplement: reviewer-comments.pdf [file reviewer-comments.pdf]

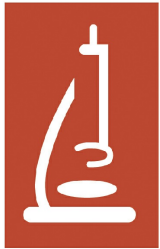

AMERICAN  
SOCIETY FOR  
MICROBIOLOGY

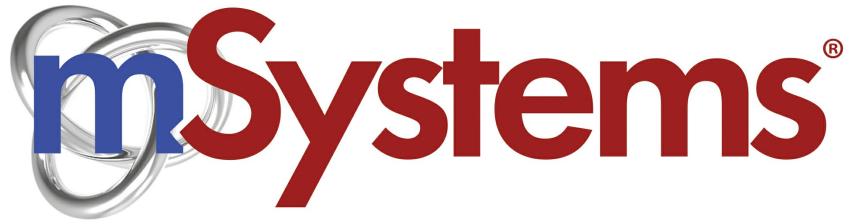

# Quantifying and cataloguing unknown sequences within human microbiomes

Sejal Modha, David Robertson, Joseph Hughes, and Richard Orton

*Corresponding Author(s): Sejal Modha, MRC-University of Glasgow Centre For Virus Research*

---

## Review Timeline:

|                     |                   |
|---------------------|-------------------|
| Submission Date:    | December 14, 2021 |
| Editorial Decision: | January 26, 2022  |
| Revision Received:  | February 9, 2022  |
| Accepted:           | February 9, 2022  |

---

*Editor: Mani Arumugam*

*Reviewer(s): The reviewers have opted to remain anonymous.*

## Transaction Report:

(Note: With the exception of the correction of typographical or spelling errors that could be a source of ambiguity, letters and reports are not edited. The original formatting of letters and referee reports may not be reflected in this compilation.)

**DOI: <https://doi.org/10.1128/msystems.01468-21>**

January 26, 2022

Dr. Sejal Modha  
MRC-University of Glasgow Centre For Virus Research  
Sir Michael Stoker Building  
464 Bearsden Road  
Glasgow G61 1QH  
United Kingdom

Re: mSystems01468-21 (Quantifying and cataloguing unknown sequences within human microbiomes)

Dear Dr. Sejal Modha:

Thank you for submitting your manuscript to mSystems. We have completed our review and I am pleased to inform you that, in principle, we expect to accept it for publication in mSystems. However, acceptance will not be final until you have adequately addressed the reviewer comments.

Both reviewers are supportive of the main message of the manuscript. The remaining criticism is on acknowledging the limitations of the approach used here. Please revise your manuscript with this in mind.

Thank you for the privilege of reviewing your work. Below you will find instructions from the mSystems editorial office and comments generated during the review.

#### **Preparing Revision Guidelines**

To submit your modified manuscript, log onto the eJP submission site at <https://msystems.msubmit.net/cgi-bin/main.plex>. Go to Author Tasks and click the appropriate manuscript title to begin the revision process. The information that you entered when you first submitted the paper will be displayed. Please update the information as necessary. Here are a few examples of required updates that authors must address:

- Point-by-point responses to the issues raised by the reviewers in a file named "Response to Reviewers," NOT IN YOUR COVER LETTER.
- Upload a compare copy of the manuscript (without figures) as a "Marked-Up Manuscript" file.
- Each figure must be uploaded as a separate file, and any multipanel figures must be assembled into one file.
- Manuscript: A .DOC version of the revised manuscript
- Figures: Editable, high-resolution, individual figure files are required at revision, TIFF or EPS files are preferred

For complete guidelines on revision requirements, please see the journal Submission and Review Process requirements at <https://journals.asm.org/journal/mSystems/submission-review-process>. **Submission of a paper that does not conform to mSystems guidelines will delay acceptance of your manuscript.**

Corresponding authors may [join or renew ASM membership](#) to obtain discounts on publication fees. Need to upgrade your membership level? Please contact Customer Service at [Service@asmusa.org](mailto:Service@asmusa.org).

Thank you for submitting your paper to mSystems.

The ASM Journals program strives for constant improvement in our submission and publication process. Please tell us how we can improve your experience by taking this quick [Author Survey](#).

Sincerely,

Mani Arumugam

Editor, mSystems

Journals Department  
American Society for Microbiology  
1752 N St., NW  
Washington, DC 20036  
E-mail: [peerreview@asmusa.org](mailto:peerreview@asmusa.org)  
Phone: 1-202-942-9338

## Reviewer comments:

Reviewer #2 (Comments for the Author):

The manuscript from Modha et al. responds to all of the points raised by the reviewers after the initial submission. I appreciate the effort of the authors to confirm the results with DeepVirFinder, and I believe the additional analyses strengthen the message of the manuscript. Overall, the message conveyed about the need of looking at unclassifiable contigs is important and should be heard. I encourage a few more minor corrections:

1. DeepVirFinder classifies many of the short contigs as viral, but does not prove that those are complete (or near-complete) viruses. Moreover, at line 406, authors write that short UCs often cluster with (partially) known contigs. Some short UCs may be fragments of known viral entities. While no further analysis is required here, authors should underline that short contigs are likely "fragments" of viruses, rather than viruses or viral genomes. This for example should be specified at lines 397~402, and in the conclusions, as a potential limitation of the study.
2. Please indicate more clearly that viral databases other than IMG/VR are available, and that there is possible overlap with those as pointed out by Reviewer 1 (point 3).
3. Lines 418-419: please indicate percentages after absolute values as done at previous lines
4. Figure 4: please enlarge the font size of pie-charts and in-country-counts to enhance readability
5. Figure 6: Does "number of microbiomes" refer to the number of distinct "microbiome types" that contribute to each cluster (i.e. gut, oral, skin etc...)? The caption is not very clear and should explain the stratification (i.e. the four different colors) better. If this is the case, consider using a more explicit "number of body districts = ..." instead.
6. Please add a supplementary table (or a separate file on the linked Zenodo repository) with each UCs and its DeepVirFinder results, q-values, CheckV score and other relevant data for classification.

February 9, 2022

Dr. Sejal Modha  
MRC-University of Glasgow Centre For Virus Research  
Sir Michael Stoker Building  
464 Bearsden Road  
Glasgow G61 1QH  
United Kingdom

Re: mSystems01468-21R1 (Quantifying and cataloguing unknown sequences within human microbiomes)

Dear Dr. Sejal Modha:

Your manuscript has been accepted, and I am forwarding it to the ASM Journals Department for publication. For your reference, ASM Journals' address is given below. Before it can be scheduled for publication, your manuscript will be checked by the mSystems production staff to make sure that all elements meet the technical requirements for publication. They will contact you if anything needs to be revised before copyediting and production can begin. Otherwise, you will be notified when your proofs are ready to be viewed.

ASM policy requires that data be available to the public upon online posting of the article, so please verify all links to sequence records, if present, and make sure that each number retrieves the full record of the data. If a new accession number is not linked or a link is broken, provide production staff with the correct URL for the record. If the accession numbers for new data are not publicly accessible before the expected online posting of the article, publication of your article may be delayed; please contact the ASM production staff immediately with the expected release date.

As an open-access publication, mSystems receives no financial support from paid subscriptions and depends on authors' prompt payment of publication fees as soon as their articles are accepted.

**Publication Fees:**

You will be contacted separately about payment when the proofs are issued; please follow the instructions in that e-mail. Arrangements for payment must be made before your article is published. For a complete list of **Publication Fees**, including supplemental material costs, please visit our [website](#).

Corresponding authors may [join or renew ASM membership](#) to obtain discounts on publication fees. Need to upgrade your membership level? Please contact Customer Service at [Service@asmusa.org](mailto:Service@asmusa.org).

**For mSystems research articles**, you are welcome to submit a short author video for your recently accepted paper. Videos are normally 1 minute long and are a great opportunity for junior authors to get greater exposure. Importantly, this video will not hold up the publication of your paper, and you can submit it at any time.

Details of the video are:

- Minimum resolution of 1280 x 720
- .mov or .mp4. video format
- Provide video in the highest quality possible, but do not exceed 1080p
- Provide a still/profile picture that is 640 (w) x 720 (h) max
- Provide the script that was used

We recognize that the video files can become quite large, and so to avoid quality loss ASM suggests sending the video file via <https://www.wetransfer.com/>. When you have a final version of the video and the still ready to share, please send it to mSystems staff at [mssystemsjournal@msubmit.net](mailto:mssystemsjournal@msubmit.net).

**For mSystems research articles**, if you would like to submit an image for consideration as the Featured Image for an issue, please contact mSystems staff at [mssystemsjournal@msubmit.net](mailto:mssystemsjournal@msubmit.net).

Thank you for submitting your paper to mSystems.

Sincerely,

Mani Arumugam

Editor, mSystems

Journals Department  
American Society for Microbiology  
1752 N St., NW  
Washington, DC 20036  
E-mail: [peerreview@asmusa.org](mailto:peerreview@asmusa.org)  
Phone: (202) 737-3600

Figure S2a and Figure S2b: Accept  
Figure S5a, Figure S5b, Figure S5c: Accept  
Figure S1: Accept  
Table S1: Accept  
Supplementary text: Accept  
Table S2: Accept  
Figure S3: Accept  
Figure S7a and Figure S7b: Accept  
Figure S6a, Figure S6b, Figure S6c: Accept  
Figure S4: Accept
